# Supplementary material for: Evaluation of the Effects of Agro Pesticides Use on Liver and Kidney Function in Farmers from Buea, Cameroon
Source: Hindawi journal article supplement (doi:10.1155/2020/2305764), 2020-01-29
Supplement: f1 [file 2305764.f1.pdf]

## SUPPLEMENTARY INFORMATION

### **Evaluation of the effects of agropesticides use on liver and kidney function in farmers from Buea, Cameroon**

Faustin Pascal Tsagué Manfo<sup>1\*</sup>, Sharon Asukia Mboe<sup>1</sup>, Edouard Akono Nantia<sup>2</sup>, Ferdinand Ngoula<sup>3</sup>, Phélix Bruno Telefo<sup>4</sup>, Paul Fewou Moundipa<sup>5</sup>, Fidelis Cho-Ngwa<sup>6</sup>

<sup>1</sup> Department of Biochemistry and Molecular Biology, Faculty of Science, University of Buea, PO Box 63 Buea, Cameroon;

<sup>2</sup> Department of Biochemistry, Faculty of Science, University of Bamenda, PO Box 39 Bambili, Cameroon;

<sup>3</sup> Department of Animal Sciences, Faculty of Agronomy and Agricultural Sciences, University of Dschang, P.O. Box 188 Dschang, Cameroon;

<sup>4</sup> Department of Biochemistry, Laboratory of Medicinal Plant Biochemistry, Food Science, and Nutrition, Faculty of Science, University of Dschang, Dschang, Cameroon;

<sup>5</sup> Laboratory of Pharmacology and Toxicology, Department of Biochemistry, Faculty of Science, University of Yaoundé I, P.O. Box 812 Yaoundé, Cameroon

<sup>6</sup> Laboratory for Drugs and Molecular Diagnostics Research (ANDI Centre of Excellence for Onchocerciasis Drug Research), Biotechnology Unit, University of Buea, Cameroon;

\* Correspondence should be addressed to F. P. T. Manfo; faustinpascal@yahoo.fr

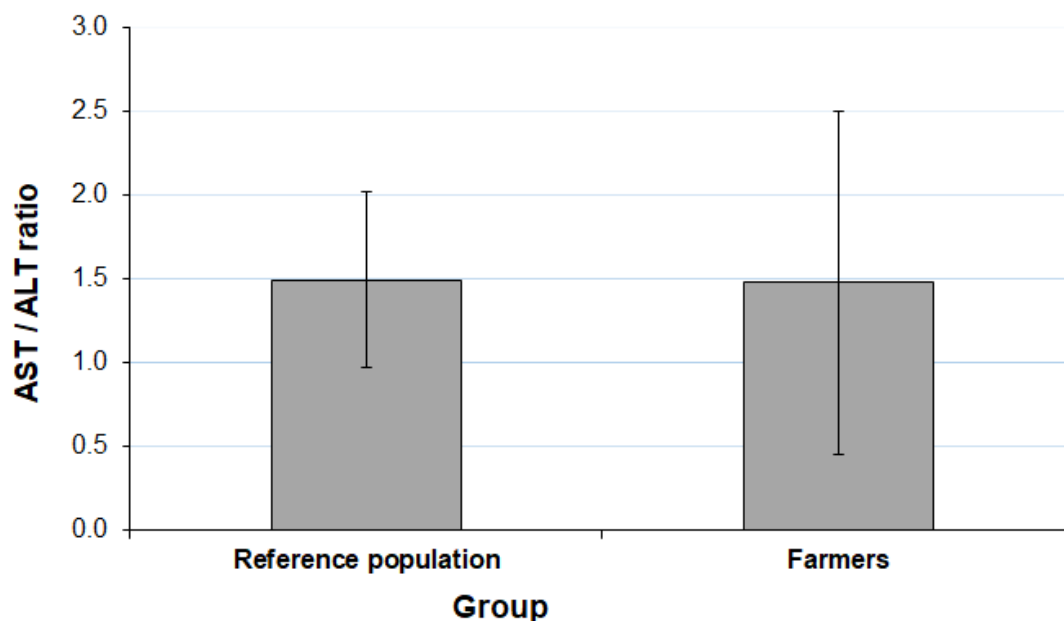

22  
23  
24  
25  
26  
27  
28  
29

**Supplement 1:** ALT / AST ratio in a reference population and farmers using agropesticides.

ALT: Alanine aminotransferase; AST: Aspartate aminotransferase. No significant difference between the 2 study populations (P = 0.926; Welch t-test)

30 **Supplement 2:** sub-statistical analysis of the effect of agrochemicals active principles or  
31 formulations on ALT activity (U/L)

|                         |      | Active principles |               |               | Pesticide formulations |               |               |
|-------------------------|------|-------------------|---------------|---------------|------------------------|---------------|---------------|
|                         |      | Metalaxyl         | Copper oxide  | Ethoprophos   | Callomil Plus          | Mocap         | Parastar      |
| Non users               | Mean | 12.6              | 16.2          | 16.4          | 16.2                   | 16.4          | 17.3          |
|                         | SD   | 2.6               | 7.3           | 7.4           | 7.3                    | 7.4           | 7.1           |
|                         | n    | 7                 | 32            | 35            | 32                     | 35            | 45            |
| Users                   | Mean | 19.2              | 21.3          | 21.6          | 21.3                   | 21.6          | 22.7          |
|                         | SD   | 7.9               | 7.5           | 7.3           | 7.5                    | 7.3           | 8.7           |
|                         | n    | 50                | 25            | 22            | 25                     | 22            | 12            |
| <i>P value (T-test)</i> |      | <i>0.0326</i>     | <i>0.0128</i> | <i>0.0123</i> | <i>0.0128</i>          | <i>0.0123</i> | <i>0.0303</i> |

32 "n" represents the sample size

33  
34  
35  
36

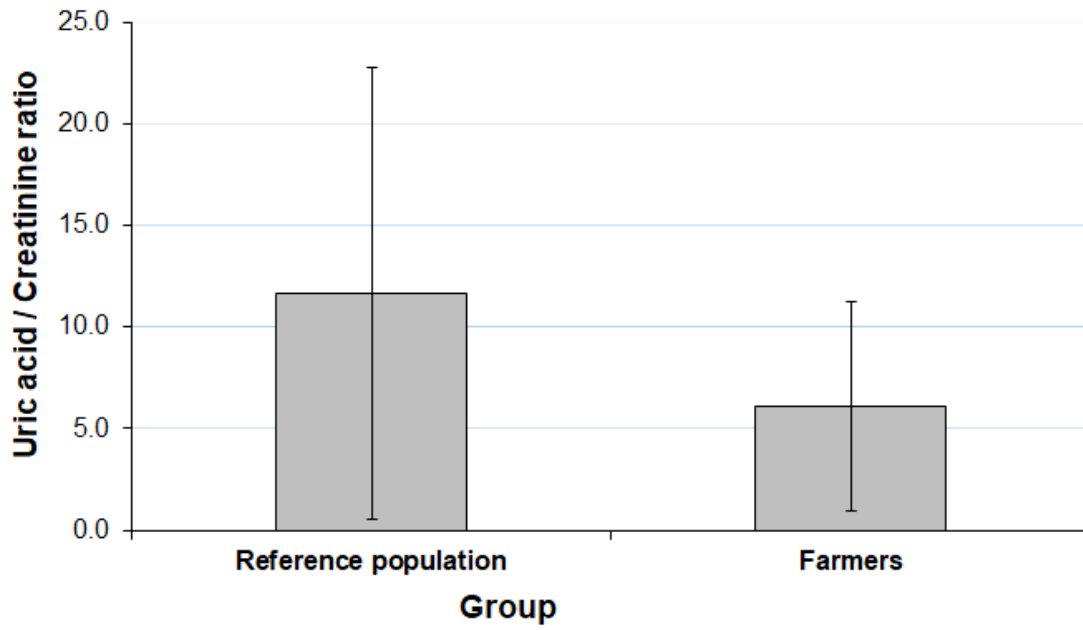

37

38 **Supplement 3:** Creatinine / uric acid ratio in a reference population and farmers using  
39 agropesticides.

40 No significant difference between the 2 study populations ( $P = 0.090$ ; Welch t-test).

41
